# Supplementary material for: Ultrasound-assisted aqueous extraction, LC-MS/MS analysis and radiomodulating capability of autochthonous Italian sweet cherry fruits
Source: Royal Society of Chemistry journal article supplement (doi:10.1039/c7fo01977g), 2018-01-01
Supplement: c7fo01977g1.pdf [file c7fo01977g1.pdf]

## Supplementary Materials

### Table legends

**Table 1S.** Mass spectrometry experimental parameters.

**Table 2S.** Experimental data of carbohydrates, rutin and 5-CGA calibration curves (Limit of detection (LOD) and of quantification (LOQ) were determined as the concentration of the standards providing signal to noise ratio (S/N) equal to 3 and 10, respectively).

### Figure legends

**Fig. 1S.** Cell Viability Inhibition (CVI, %)  $\pm$  SD of different dose levels of PaDRw (100, 200, and 400  $\mu\text{g/mL}$ ) by SRB test on SH-SY5Y cell line at 48 h exposure time. Values are reported as mean  $\pm$  SD of measurements carried out on 3 samples ( $n = 3$ ) analyzed 12 times. Vbn = vinblastine; Tx = Trolox<sup>®</sup>

**Fig. 2S.** PaDRw (a) UV-Vis spectrum; (b) LC-UV chromatogram recorded at 280 nm; (c) TIC chromatogram recorded in negative ion mode

**Figure 3S.** Main phenol and polyphenol metabolites identified in PaDRw-2 fraction.

**Table 1S.**

|                                                    | <b>PaDRw-1</b> | <b>PaDRw-2</b> |
|----------------------------------------------------|----------------|----------------|
| Nebulisation gas (N <sub>2</sub> ) flow rate (L/h) | 30             | 50             |
| Desolvation gas (N <sub>2</sub> ) flow rate (L/h)  | 300            | 500            |
| Source T (°C)                                      | 110            | 120            |
| Desolvation T (°C)                                 | 400            | 500            |
| Capillary voltage (kV)                             | 3.0            | 2.8            |
| Cone voltage (V)                                   | 10-55          | 10-55          |

**Table 2S.**

| standard | Range             | Calibration curve      | $R^2$  | LOD <sup>a</sup> | LOQ <sup>a</sup> | RSD% <sup>b</sup> | RSD% <sup>c</sup> |
|----------|-------------------|------------------------|--------|------------------|------------------|-------------------|-------------------|
| fructose | 0.5-10 mg/mL      | $y = 478869x + 509615$ | 0.9855 | 2.7              | 8.5              | 2.2-3.8           | 0.5-1.3           |
| glucose  | 0.5-4 mg/mL       | $y = 504332x + 590484$ | 0.9974 | 2.5              | 10.1             | 1.8-3.3           | 0.7-1.6           |
| sucrose  | 0.015-0.3 mg/mL   | $y = 4E+06x + 30790$   | 0.9998 | 1.2              | 4.3              | 1.9-2.7           | 0.6-2.6           |
| rutin    | 0.01875-0.6 mg/mL | $y = 123253x + 223.48$ | 0.9999 | 4.68             | 18.7             | 3.1-4.6           | 0.3-3.0           |
| 5-CGA    | 0.0156-10 mg/mL   | $y = 210216x - 2677.2$ | 0.9992 | 3.9              | 15.6             | 0.5-2.7           | 0.2-2.1           |

<sup>a</sup> Expressed as ng on column

<sup>b</sup> Inter-day precision, expressed as relative standard deviation ( $RSD (\%) = (SD/mean) \times 100$ )

<sup>c</sup> Intra-day precision, expressed as relative standard deviation ( $RSD (\%) = (SD/mean) \times 100$ )

**Fig. 1S.**

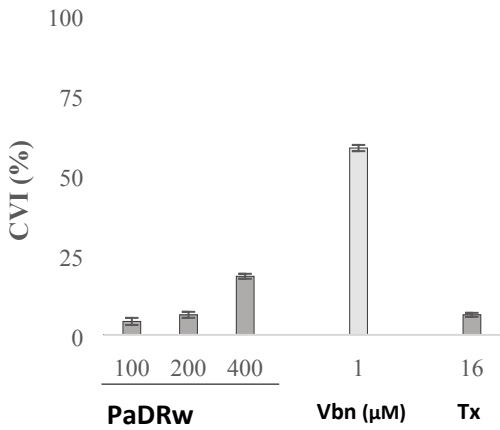

**Fig. 2S.**

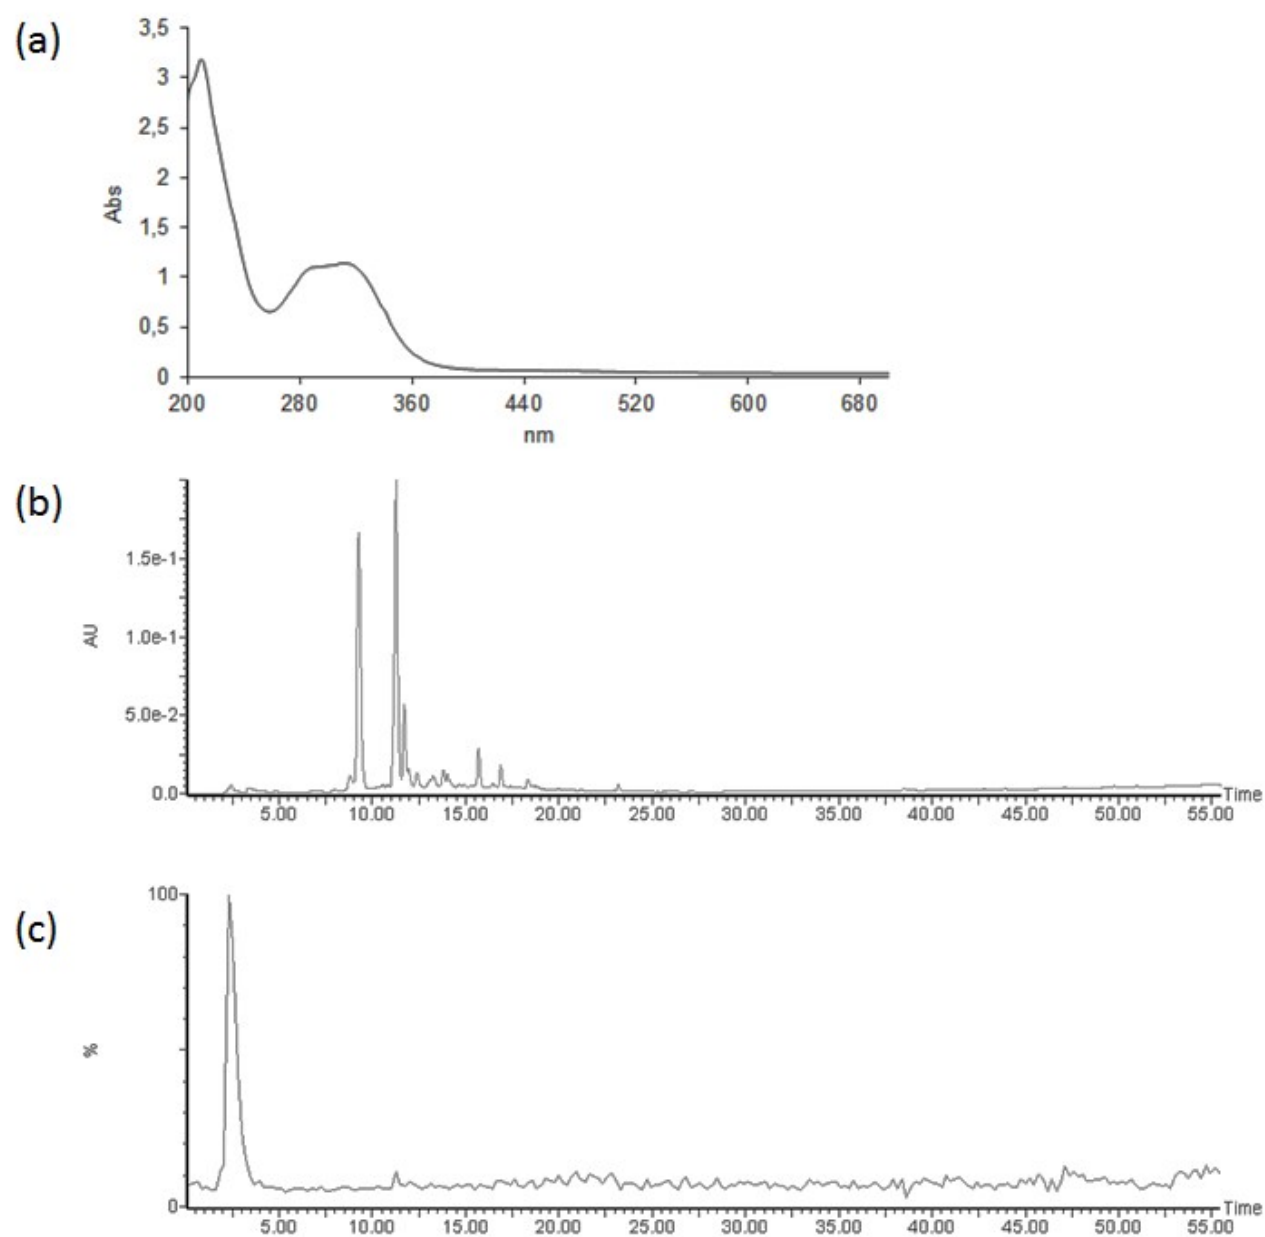

**Fig. 3S.**

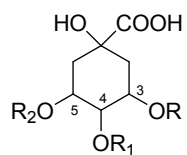

- 1'** R = caffeoyl; R<sub>1</sub> = R<sub>2</sub> = H  
**2'** R = *p*-coumaroyl; R<sub>1</sub> = R<sub>2</sub> = H  
**3'** R = R<sub>1</sub> = H; R<sub>2</sub> = caffeoyl  
**4'** R = R<sub>2</sub> = H; R<sub>1</sub> = caffeoyl  
**7'** R = R<sub>1</sub> = H; R<sub>2</sub> = *p*-coumaroyl  
**8'** R = R<sub>2</sub> = H; R<sub>1</sub> = *p*-coumaroyl  
**10'** R = R<sub>2</sub> = caffeoyl; R<sub>1</sub> = H

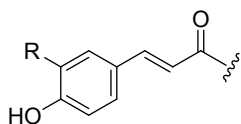

- R = OH caffeoyl  
 R = H *p*-coumaroyl

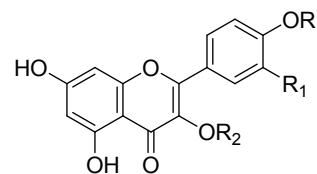

- 9'** R = hexose; R<sub>1</sub> = OH; R<sub>2</sub> = rutinose  
**11'** R = H; R<sub>1</sub> = OH; R<sub>2</sub> = rutinose  
**12'** R = H; R<sub>1</sub> = OH; R<sub>2</sub> = hexose  
**13'** R = R<sub>1</sub> = H; R<sub>2</sub> = rutinose  
**14'** R = R<sub>1</sub> = H; R<sub>2</sub> = hexose
